# Supplementary material for: Effect of potent nucleos(t)ide analog on alpha fetoprotein changes and occurrence of hepatocellular carcinoma in patients with chronic hepatitis B
Source: Research Square preprint supplement (doi:10.21203/rs.3.rs-5217237/v1), 2024-12-16
Supplement: Supplementary file 1 [file 3970b1f5d032238533533619.docx]

**Table 1. Baseline characteristics of hepatitis B patients with normal AFP and elevated AFP before follow-up treatment in our hospital.**

|  | **Normal AFP (N=1715)** | | **Elevated AFP (N=227)** | | **P value** | **Post-hoc** | | | | | |
| --- | --- | --- | --- | --- | --- | --- | --- | --- | --- | --- | --- |
|  | **HCC** | **Non-HCC** | **HCC** | **Non-HCC** | **1# vs. 2#** | **1# vs. 3#** | **1# vs. 4#** | **2# vs. 3#** | **2# vs. 4#** | **3# vs. 4#** | |
| Patients, n (%) | 35 (2.0) | 1680 (98.0) | 26 (11.5) | 201 (88.5) |  |  |  |  |  |  |  | |
| Age, years | 50.1 ± 9.1 | 40.1 ± 12.6 | 55.0± 12.3 | 44.0 ± 12.4 | ＜0.001 | ＜0.001 | 0.128 | 0.008 | ＜0.001 | ＜0.001 | ＜0.001 | |
| Male, n (%) | 30 (85.7) | 1105 (65.8) | 21 (80.8) | 162 (80.6) | ＜0.001 | 0.014 | 0.606 | 0.473 | 0.109 | ＜0.001 | 0.983 | |
| BMI, kg/m2 | 23.2 (21.2,25.3) | 22.2 (20.0,24.6) | 22.2 (20.1,23.6) | 23.1 (22.0,23.9) | 0.188 |  |  |  |  |  |  | |
| History of HBV, years | 14.5 (8.0,20.0) | 10.0 (6.0,20.0) | 12.5 (10.0,20.0) | 10.0 (5.0,20.0) | 0.381 |  |  |  |  |  |  | |
| NAFLD, n (%) | 2 (5.7) | 259 (15.4) | 2 (7.7) | 21 (10.4) | 0.076 |  |  |  |  |  |  | |
| T2DM, n (%) | 2 (5.7) | 51 (3.0) | 1 (4.0) | 7 (3.5) | 0.811 |  |  |  |  |  |  | |
| **Hepatitis B Virology** | | | | | | | | | | | | |
| Log10 HBVDNA, IU/mL | 3 (2,5) | 4 (2,6) | 4 (2,5) | 6 (4,7) | ＜0.001 | 0.703 | 0.998 | 0.001 | 0.740 | ＜0.001 | 0.003 | |
| Log10 HBsAg quantification,  IU/mL | 3 (3,3) | 3 (3,4) | 3 (2,3) | 3 (3,4) | 0.002 | 0.036 | 0.470 | 0.014 | 0.004 | 0.197 | 0.002 | |
| HBeAg-positive, n (%) | 6 (17.1) | 713 (42.4) | 12 (46.2) | 97 (48.3) | ＜0.001 | 0.003 | 0.014 | 0.001 | 0.704 | 0.115 | 0.840 | |
| **Biochemistry** |  |  |  |  |  |  |  |  |  |  |  | |
| ALT, U/L | 45 (33,61) | 36 (24,58) | 47 (33,72) | 87 (45,296) | ＜0.001 | 0.354 | 0.397 | ＜0.001 | 0.769 | ＜0.001 | ＜0.001 | |
| AST, U/L | 35 (29,50) | 31 (25,47) | 62 (47,119) | 87 (50,197) | ＜0.001 | 0.917 | 0.175 | ＜0.001 | 0.086 | ＜0.001 | ＜0.001 | |
| GGT, U/L | 32 (26,61) | 26 (18,45) | 122 (37,257) | 85 (50,141) | ＜0.001 | 0.860 | 0.336 | 0.080 | 0.153 | ＜0.001 | 0.717 | |
| Alkaline phosphatase, U/L | 87 (78,101) | 76 (65,90) | 122 (83,165) | 99 (79,121) | ＜0.001 | 0.118 | ＜0.001 | 0.189 | ＜0.001 | ＜0.001 | 0.001 | |
| ALB, U/L | 43.2 (39.3,46.7) | 44.8 (42.3.46.9) | 40.4 (37.7,42.5) | 41.6 (37.6,44.2) | ＜0.001 | 0.080 | 0.893 | 0.906 | 0.074 | ＜0.001 | 0.950 | |
| GLB, U/L | 30.9 (28.8,32.9) | 29.1 (26.4,32.1) | 32.1 (30.5,36.0) | 33.2 (29.0,36.0) | 0.013 | 0.702 | 0.528 | 0.403 | 0.226 | 0.002 | 0.980 | |
| Total bilirubin, umol/L | 12.9 (12.1,14.7) | 14.2 (10.9,19.3) | 20.2 (15.0,38.6) | 19.4 (15.6,33.4) | ＜0.001 | 0.196 | 0.041 | 0.001 | ＜0.001 | ＜0.001 | 0.563 | |
| Direct bilirubin, umol/L | 2.9 (2.4,3.7) | 2.9 (2.1,4.2) | 4.8 (3.6,8.1) | 5.6 (3.8,11.0) | ＜0.001 | 0.029 | 0.203 | 0.012 | ＜0.001 | ＜0.001 | ＜0.001 | |
| PLT, 10^9/L | 159 (108,191) | 204 (164,247) | 127 (82,145) | 155 (111,187) | ＜0.001 | ＜0.001 | 0.820 | 0.411 | 0.001 | ＜0.001 | 0.641 | |
| INR | 1.0 (0.9,1.1) | 1.0 (0.9,1.1) | 1.1 (1.0,1.1) | 1.2 (1.1,2.0) | 0.943 |  |  |  |  |  |  | |
| LSM with SWE, kPa | 13.8 (7.4,15.6) | 6.1 (5.3,8.0) | 15.6 (13.2,17.9) | 13.1 (7.5,16.0) | ＜0.001 | ＜0.001 | 0.022 | 0.286 | ＜0.001 | ＜0.001 | 0.049 | |
| AFP, ng/mL | 3.8 (2.8,6.6) | 2.8 (2.0,4.3) | 95.1 (33.4,414.2) | 47.7 (25.4,124.0) | 0.008 | 0.999 | 0.420 | 0.199 | 0.278 | 0.001 | 0.873 | |
| Cirrhosis, n (%) | 25 (71.4) | 289 (17.2) | 22 (84.6) | 158 (78.6) | ＜0.001 | ＜0.001 | 0.402 | 0.348 | ＜0.001 | ＜0.001 | 0.799 | |
| REACH-B score | 9.4 ± 2.7 | 7.3 ± 3.4 | 10.9 ± 3.3 | 10.0 ± 3.2 | ＜0.001 | ＜0.001 | 0.088 | 0.315 | ＜0.001 | ＜0.001 | 0.215 | |
| Page-B score | 20.4 ± 4.7 | 14.4 ± 6.0 | 22.5 ± 5.1 | 18.8± 6.2 | ＜0.001 | ＜0.001 | 0.219 | 0.177 | ＜0.001 | ＜0.001 | 0.005 | |
| mPage-B score | 12.8 ± 3.1 | 7.7 ± 3.8 | 13.2 ± 3.3 | 10.4 ± 3.9 | ＜0.001 | ＜0.001 | 0.668 | 0.002 | ＜0.001 | ＜0.001 | 0.001 | |
| aMAP score | 58.6 ± 8.1 | 46.7 ± 9.2 | 60.3 ± 7.0 | 54.4 ± 8.7 | ＜0.001 | ＜0.001 | 0.506 | 0.024 | ＜0.001 | ＜0.001 | 0.003 | |
| **Medication** |  |  |  |  |  |  |  |  |  |  |  | |
| None, n(%) | 16 (45.7) | 1178 (70.1) | 11 (42.3) | 127 (63.2) | ＜0.001 | 0.002 | 0.791 | 0.051 | 0.002 | 0.044 | 0.040 | |
| **Nucleoside analogues, n(%)** | 19 (54.3) | 502 (29.49) | 15 (57.7) | 74 (36.8) | ＜0.001 | 0.002 | 0.791 | 0.051 | 0.002 | 0.044 | 0.040 | |
| ETV, n(%) | 12 (63.2) | 252 (50.2) | 6 (40.0) | 48 (64.9) | 0.061 | 0.267 | 0.179 | 0.890 | 0.436 | 0.018 | 0.072 | |
| TDF, n(%) | 0 (0.0) | 33 (6.6) | 0 (0.0) | 6 (8.1) |  |  |  |  |  |  |  | |
| TAF, n(%) | 0 (0.0) | 3 (0.6) | 0 (0.0) | 1 (1.4) |  |  |  |  |  |  |  | |
| Others (LAM, LdT, ADV), n(%) | 7 (36.8) | 214 (42.6) | 9 (60.0) | 19 (25.7) | 0.018 | 0.616 | 0.179 | 0.333 | 0.181 | 0.006 | 0.009 | |

Data are median (first quartile, third quartile), n (%), or mean ± SD (standard deviation).

# 1- Normal AFP with HCC group; 2- Normal AFP without HCC group; 3- Elevated AFP with HCC group; 4- Elevated AFP without HCC group.

Abbreviations: AFP: alpha fetoprotein. HCC: hepatic cell carcinoma. BMI: body mass index. HBV: hepatitis B virus. NAFLD: non-alcoholic fatty liver disease. T2DM: type 2 diabetes mellitus. ALT: alanine aminotransferase. AST: aspartate aminotransferase. GGT: gamma-glutamyl transferase. ALB: albumin. GLB: globulin. TB: total bilirubin. DB: direct bilirubin. PLT: platelet. INR: international normalized ratio. SWE: shear wave elastography. ETV: entecavir. TDF: tenofovir disoproxil fumarate. TAF: tenofovir alafenamide fumarate. LAM: lamivudine. LdT: telbivudine. ADV: adefovir dipivoxil.

**Table 2. Comparison of the first examination results between patients with antiviral drugs and patients without antiviral drugs during the follow-up in our hospital.**

|  | **None (N=527)** |  | **Others (N=268)** |  | **ETV(N=759)** | |  | **TDF(N=360)** | |  |
| --- | --- | --- | --- | --- | --- | --- | --- | --- | --- | --- |
|  | **AFP≤20(ng/mL)** |  | **AFP≤20(ng/mL)** |  | **AFP≤20(ng/mL)** | **AFP > 20(ng/mL)** |  | **AFP≤20(ng/mL)** | **AFP > 20(ng/mL)** | **P value** |
| Patients | 527 |  | 268 |  | 598 | 161 |  | 324 | 36 |  |
| Age, years | 38.1 ± 10.0 |  | 36.6 ± 10.7 |  | 38.5 ± 9.0 | 37.5 ± 8.8 |  | 36.8 ± 10.1 | 37.1 ± 10.1 | 0.098 |
|  |  |  | NSa ‡ |  | NSab | NSabc |  | NSabcd | NSabcde |  |
| Male, n (%) | 344 (65.3) |  | 183 (68.3) |  | 437 (73.1) | 120 (74.5) |  | 223 (68.8) | 27 (75.0) | 0.057 |
|  |  |  | NSa |  | NSab | NSabc |  | NSabcd | NSabcde |  |
| BMI, kg/m2 | 22.2 (19.9.,25.0) |  | 21.8 (19.4,24.1) |  | 22.4 (20.6,24.6) | 23.0 (21.4,23.9) |  | 22.2 (19.7,24.2) | 23.2 (22.,24.1) | 0.028 |
|  |  |  | *a |  | Nsa, *b | NSabc |  | NSabd,*c | NSabcde |  |
| History of HBV, years | 10 (7,20) |  | 10 (8,15) |  | 10 (7,20) | 10 (6,20) |  | 10 (7,20) | 10 (6,20) | 0.005 |
|  |  |  | NSa |  | *a, **b | NSabc |  | NSabd,*c | NSabcde |  |
| NAFLD, n (%) | 90 (17.1) |  | 30 (11.2) |  | 80 (13.4) | 16 (9.9) |  | 49 (15.1) | 3 (8.3) | 0.088 |
|  |  |  | NSa |  | NSab | NSabc |  | NSabcd | NSabcde |  |
| T2DM, n (%) | 11 (2.1) |  | 7 (2.6) |  | 31 (5.2) | 8 (5.0) |  | 12 (3.7) | 2 (5.6) | 0.091 |
|  |  |  | NSa |  | NSab | NSabc |  | NSabcd | NSabcde |  |
| **Hepatitis B Virology** | | | | | | | | | | |
| Log10 HBVDNA, IU/mL | 2 (2,5) |  | 4 (2,7) |  | 4 (2,5) | 5 (3,7) |  | 5 (2,7) | 6 (5,7) | ＜0.001 |
|  |  |  | **a |  | *a, **b | **ac, *b |  | **ac, *b, NSd | **ac, *b, NSde |  |
| Log10 HBsAg quantification, IU/mL | 3 (2,4) |  | 4 (3,4) |  | 3 (3,4) | 3 (3,4) |  | 4 (3,5) | 4 (3,4) | ＜0.001 |
|  |  |  | **a |  | *a, **b | *ab, NSc |  | **acd, *b | **a, *c, NSbde |  |
| HBeAg-positive, n (%) | 127 (24.1) |  | 171 (63.8) |  | 278 (46.5) | 79 (49.1) |  | 190 (58.6) | 19 (52.8) | ＜0.001 |
|  |  |  | **a |  | **ab | *ab, NSc |  | **ac, NSb, *d | **a, NSbcde |  |
| **Biochemistry** | | | | | | | | | | |
| ALT, U/L | 28 (20,39) |  | 44 (26,80) |  | 35 (25,57) | 84 (46,370) |  | 39 (26,71) | 170 (56,572) | ＜0.001 |
|  |  |  | *a |  | *a,NSb | **abc |  | *a, NSbc, **d | **abcde |  |
| AST, U/L | 26 (22,34) |  | 33 (27,63) |  | 32 (25,48) | 95 (58,217) |  | 34 (25,58) | 137 (54,336) | ＜0.001 |
|  |  |  | *a |  | *a,NSb | **abc |  | *a, NSbc, **d | **abce, *d |  |
| GGT, U/L | 21 (16,37) |  | 26 (18,42) |  | 29 (20,52) | 92 (54,174) |  | 25 (19,43) | 89 (54,118) | 0.089 |
|  |  |  | NSa |  | NSab | NSabc |  | NSabcd | NSabcde |  |
| Alkaline phosphatase, U/L | 71 (62,85) |  | 82 (67,101) |  | 75 (66,90) | 102 (81,134) |  | 74 (65,83) | 97 (75,110) | ＜0.001 |
|  |  |  | NSa |  | *a,NSb | **abc |  | NSabc,**d | *ade, NSbc |  |
| ALB, U/L | 45.0 (43.0,47.5) |  | 44.8 (42.7,46.7) |  | 44.5 (42.3.46.8) | 41.6 (37.2,44.0) |  | 44.7 (42.1,46.5) | 41.5 (39.1,44.3) | ＜0.001 |
|  |  |  | NSa |  | *a,NSb | **abc |  | NSabc,**d | *a, NSbcde |  |
| GLB, U/L | 29.3 (26.5,32.3) |  | 29.9 (28.0,33.7) |  | 28.8 (26.1,31.9) | 33.6 (30.4,36.6) |  | 29.2 (26.2,32.1) | 32.9 (28.4,35.0) | 0.014 |
|  |  |  | NSa |  | NSab | *ac, NSb |  | NSabc,*d | NSabcde |  |
| Total bilirubin, umol/L | 13.5 (10.2,17.3) |  | 13.5 (10.4,18.9) |  | 15.0 (11.8,20.1) | 20.3 (16.2,30.6) |  | 14.2 (10.9,18.8) | 18.9 (16.1,26.7) | ＜0.001 |
|  |  |  | NSa |  | NSab | **abc |  | NSabc,**d | *abcde |  |
| Direct bilirubin, umol/L | 2.7 (3.1,3.7) |  | 2.9 (2.0,4.2) |  | 3.0 (2.3,4.8) | 6.1 (3.9,10.6) |  | 2.9 (2.1,4.2) | 4.7 (3.8,10.8) | ＜0.001 |
|  |  |  | NSa |  | NSab | **abc |  | NSabc,**d | *abcde |  |
| PLT, 10^9/L | 224 (190,259) |  | 199 (167,263) |  | 193 (151,233) | 147 (108,178) |  | 215 (164,250) | 168 (114,200) | ＜0.001 |
|  |  |  | NSa |  | **ab | **abc |  | *ab, **cd | *ab, NScd, **e |  |
| LSM with SWE, kPa | 5.7 (4.9,6.3) |  | 6.7 (5.8,8.0) |  | 6.8 (5.6,9.3) | 15.0 (6.9,15.6) |  | 6.0 (5.2,8.1) | 12.9 (8.8,17.0) | ＜0.001 |
|  |  |  | *a |  | **ab | **abc |  | *a, NSb, **cd | **abce, *d |  |
| AFP, ng/mL | 2.3 (1.7,3.4) |  | 3.0 (2.0,4.7) |  | 3.1 (2.3,5.1) | 61.0 (35.8,216) |  | 2.7 (2.0,3.8) | 79.5 (32.8,147.8) | 0.006 |
|  |  |  | NSa |  | NSab | **ac, *b |  | NSabc,*d | NSabcde |  |
| Cirrhosis, n(%) | 29 (5.5) |  | 33 (12.3) |  | 179 (29.9) | 125 (77.6) |  | 72 (22.2) | 30 (83.3) | ＜0.001 |
|  |  |  | *a |  | **ab | **abc |  | **ad, *bc | **abce, NSd |  |
| REACH-B score | 5.7 ± 3.0 |  | 7.4 ± 3.0 |  | 8.2 ± 3.5 | 10.6 ± 3.1 |  | 8.0 ± 3.0 | 9.1 ± 2.8 | ＜0.001 |
|  |  |  | **a |  | **ab | **abc |  | **ad, *b, NSc | **a, *bde, NSc |  |
| Page-B score | 12.1 ± 5.6 |  | 13.0 ± 5.6 |  | 16.9 ± 5.9 | 20.2 ± 5.9 |  | 14.2 ± 5.5 | 16.7 ± 5.1 | ＜0.001 |
|  |  | NSa |  | **ab | **abc |  | **acd, *b | **ab, *de, NSc |
| mPage-B score | 7.0 ± 3.4 |  | 6.1 ± 3.7 |  | 9.6 ± 3.6 | 11.5 ± 3.8 |  | 6.6 ± 3.5 | 6.1 ± 3.7 | ＜0.001 |
|  |  | *a |  | **ab | **abc |  | **cd, NSab | **bd, *ae, NSc |
| aMAP score | 44.7 ± 8.2 |  | 43.3 ± 8.6 |  | 51.1 ± 8.9 | 56.7 ± 8.7 |  | 43.9 ± 8.5 | 50.8 ± 6.1 | ＜0.001 |
|  |  | NSa |  | **ab | **abc |  | **cd, NSab | **abde, NSc |

Data are median (first quartile, third quartile), n (%), or mean ± SD (standard deviation).

P values were for the ANOVA analysis across the groups, * P < 0.05, ** P < 0.001.

‡ a—compared with None group, b—compared withOthers group, c—compared with ETV and AFP ≤ 20 (ng/mL) group, d—compared with ETV and AFP > 20 (ng/mL) group, e—compared with TDF and AFP ≤ 20 (ng/mL) group, NS— non significant.

Abbreviations: ETV: entecavir. TDF: tenofovir disoproxil fumarate. AFP: alpha fetoprotein. HCC: hepatic cell carcinoma. BMI: body mass index. HBV: hepatitis B virus. NAFLD: non-alcoholic fatty liver disease. T2DM: type 2 diabetes mellitus. ALT: alanine aminotransferase. AST: aspartate aminotransferase. GGT: gamma-glutamyl transferase. ALB: albumin. GLB: globulin. TB: total bilirubin. DB: direct bilirubin. PLT: platelet. INR: international normalized ratio. SWE: shear wave elastography. Others: LAM: lamivudine; LdT: telbivudine; ADV: adefovir dipivoxil.

**Table 3. Characteristics after ETV / TDF therapy** [**strategies**](https://fanyi.baidu.com/translate?aldtype=16047&query=&keyfrom=baidu&smartresult=dict&lang=auto2zh###) **with the development of abnormal AFP and HCC.**

|  | **ETV(N=708)** |  |  |  | **TDF(N=339)** |  |  | **P value** |
| --- | --- | --- | --- | --- | --- | --- | --- | --- |
|  | **HCC** | **AFP>20(ng/mL)** | **AFP≤20(ng/mL)** |  | **HCC** | **AFP>20(ng/mL)** | **AFP≤20(ng/mL)** |
| Patients, n (%) | 24 (3.4) | 64 (9.0) | 620 (87.6) |  | 2 (0.6) | 16 (4.7) | 321 (94.7) |  |
| Age, years | 53.7 ± 11.4 | 45.6 ± 11.7 | 44.8 ± 12.3 |  | 62.0 ± 5.7 | 37.0 ± 8.1 | 35.6 ± 10.2 | ＜0.001 |
| Male, n (%) | 20 (83.3) | 53 (82.8) | 451 (72/7) |  | 1 (50.0) | 10 (62.5) | 215 (67.0) | 0.063 |
| BMI, kg/m2 | 23.0 (21.0,24.1) | 23.3 (22.6,23.9) | 22.8 (20.8,24.8) |  | 22.5 (22.5,22.6) | 23.4 (22.5,25.0) | 22.6 (19.9,24.2) | 0.587 |
| History of HBV, years | 10 (10,20) | 10 (5,20) | 10 (6,15) |  | 7.5 (5,10) | 20 (12,20) | 10 (6.5,20) | 0.034 |
| NAFLD, n (%) | 2 (8.3) | 6 (9.4) | 85 (13.7) |  | 0 (0.0) | 3 (18.8) | 48 (15.0) | 0.750 |
| T2DM, n (%) | 2 (8.3) | 3 (4.7) | 29 (4.7) |  | 0 (0.0) | 1 (6.3) | 10 (3.1) | 0.773 |
| **Hepatitis B Virology** | | | | | | | | |
| Log10 HBVDNA, IU/mL | 5 (3,6) | 5 (4,7) | 4 (2,6) |  | 4 (2,5) | 5 (3,7) | 5 (2,7) | ＜0.001 |
| Log10 HBsAg, IU/mL | 3 (2,3) | 3 (3,4) | 3 (3,4) |  | 3 (3,3) | 3 (3,3) | 4 (3,5) | ＜0.001 |
| HBeAg-positive, n (%) | 11 (45.8) | 30 (46.9) | 255 (41.1) |  | 0 (0.0) | 7 (43.8) | 192 (59.8) | ＜0.001 |
| **Biochemistry** |  |  |  |  |  |  |  |  |
| ALT, U/L | 44 (24,68) | 84 (45,283) | 43 (27,86) |  | 36 (27,44) | 100 (48,267) | 47 (27,85) | ＜0.001 |
| AST, U/L | 56 (33,71) | 95 (48,246) | 39 (28,67) |  | 37 (32,42) | 72 (38,176) | 36 (26,69) | ＜0.001 |
| GGT, U/L | 51 (33,185) | 93 (58,162) | 38 (24,78) |  | 36 (31,41) | 77 (22,110) | 28 (19,56) | ＜0.001 |
| Alkaline phosphatase, U/L | 101 (80,145) | 109 (82,148) | 80 (67,98) |  | 97 (91,103) | 81 (62,87) | 75 (66,88) | ＜0.001 |
| ALB, U/L | 39.1 (30.3,43.3) | 41.9 (38.9,44.8) | 43.7 (40.9,46.0) |  | 45.7 (44.3,47.0) | 41.9 (40.0,44.3) | 44.7 (41.7,46.4) | 0.100 |
| GLB, U/L | 36.0 (29.6,39.5) | 31.7 (28.3,37.0) | 29.8 (26.7,33.8) |  | 31.9 (27.0,36.7) | 29.9 (26.0,33.2) | 29.4 (26.8,32.9) | ＜0.001 |
| Total bilirubin, umol/L | 21.9 (13.4,38.9) | 19.6 (14.1,32.0) | 16.5 (12.2,22.0) |  | 11.2 (8.2,14.2) | 12.9 (10.8,24.1) | 15.3 (11.5,20.2) | ＜0.001 |
| Direct bilirubin, umol/L | 6.4 (3.4,12.9) | 8.0 (3.9,12.5) | 3.6 (2.5,5.5) |  | 2.4 (1.8,3.0) | 3.5 (2.1,9.1) | 3.1 (2.2,4.5) | ＜0.001 |
| PLT, 10^9/L | 114 (77,164) | 160 (125,189) | 173 (130,217) |  | 116 (71,160) | 176 (134,190) | 214 (168,255) | ＜0.001 |
| INR | 1.11 (1.08,1.14) | 1.85 (1.13,2.02) | 1.02 (0.96,1.12) |  | 1.53 (1.03,2.02) | 1.09 (0.98,1.20) | 1.00 (0.95,1.06) | 0.774 |
| LSM with SWE, kPa | 16.3 (9.5,26.3) | 12.9 (7.6,15.5) | 7.7 (5.9,13.5) |  | 11.7 (8.1,15.3) | 7.3 (4.8,18.1) | 6.1 (5.2,9.2) | ＜0.001 |
| AFP, ng/mL | 9.6 (2.9,32.8) | 46.4 (22.2,214.5) | 4.6 (2.7,21.2) |  | 9.8 (4.6,15.0) | 18.0 (2.7,118.5) | 2.9 (2.1,7.0) | 0.002 |
| Cirrhosis, n (%) | 23 (95.8) | 45 (70.3) | 193 (31.1) |  | 2 (100.0) | 8 (50.0) | 81 (25.2) | ＜0.001 |
| REACH-B score | 11.5 ± 3.3 | 10.5 ± 3.2 | 8.3 ± 3.5 |  | 10.5 ± 0.7 | 8.4 ± 3.4 | 7.9 ± 3.1 | ＜0.001 |
| Page-B score | 17.1 ± 4.1 | 14.3 ± 4.9 | 12.7 ± 5.3 |  | 17.5 ± 7.8 | 10.6 ± 5.9 | 8.9 ± 4.9 | ＜0.001 |
| mPage-B score | 13.5 ± 3.0 | 10.4 ± 3.9 | 9.6 ± 3.7 |  | 13.0 ± 4.2 | 7.6 ± 3.6 | 6.6 ± 3.4 | ＜0.001 |
| aMAP score | 60.9 ± 7.2 | 54.4 ± 9.4 | 51.3 ± 8.9 |  | 60.0 ± 11.3 | 47.7 ± 7.6 | 44.2 ± 8.3 | ＜0.001 |

**Table continued**

|  | **Post-hoc** | | | | | | | | | | | | | | |
| --- | --- | --- | --- | --- | --- | --- | --- | --- | --- | --- | --- | --- | --- | --- | --- |
|  | **1# vs. 2#** | **1# vs. 3#** | **1# vs. 4#** | **1# vs. 5#** | **1# vs. 6#** | **2# vs. 3#** | **2# vs. 4#** | **2# vs. 5#** | **2# vs. 6#** | **3# vs. 4#** | **3# vs. 5#** | **3# vs. 6#** | **4# vs. 5#** | **4# vs. 6#** | **5# vs. 6#** | |
| Patients, n (%) |  |  |  |  |  |  |  |  |  |  |  |  |  |  |  | |
| Age, years | 0.003 | ＜0.001 | 0.332 | ＜0.001 | ＜0.001 | 0.636 | 0.049 | 0.008 | ＜0.001 | 0.037 | 0.008 | ＜0.001 | 0.004 | 0.001 | 0.635 | |
| Male, n (%) |  |  |  |  |  |  |  |  |  |  |  |  |  |  |  | |
| BMI, kg/m2 |  |  |  |  |  |  |  |  |  |  |  |  |  |  |  | |
| History of HBV, years | 0.043 | 0.057 | 0.153 | 0.704 | 0.010 | 0.500 | 0.430 | 0.195 | 0.640 | 0.355 | 0.279 | 0.027 | 0.215 | 0.478 | 0.096 | |
| NAFLD, n (%) |  |  |  |  |  |  |  |  |  |  |  |  |  |  |  | |
| T2DM, n (%) |  |  |  |  |  |  |  |  |  |  |  |  |  |  |  | |
| **Hepatitis B Virology** | | | | | | | | | | | | | | | | |
| Log10 HBVDNA, IU/mL | 0.354 | 0.046 | 0.406 | 0.155 | 0.413 | ＜0.001 | 0.246 | 0.396 | 0.724 | 0.781 | 0.001 | ＜0.001 | 0.154 | 0.269 | 0.265 | |
| Log10 HBsAg quantification, IU/mL | 0.001 | 0.006 | 0.478 | 0.003 | ＜0.001 | 0.045 | 0.057 | 0.629 | 0.012 | 0.119 | 0.114 | ＜0.001 | 0.045 | 0.016 | 0.404 | |
| HBeAg-positive, n (%) | 0.930 | 0.646 | 0.207 | 0.897 | 0.179 | 0.375 | 0.190 | 0.823 | 0.056 | 0.238 | 0.833 | ＜0.001 | 0.231 | 0.086 | 0.202 | |
| **Biochemistry** |  |  |  |  |  |  |  |  |  |  |  |  |  |  |  | |
| ALT, U/L | 0.001 | 0.273 | 0.890 | ＜0.001 | 0.183 | ＜0.001 | 0.189 | 0.271 | ＜0.001 | 0.637 | ＜0.001 | 0.427 | 0.095 | 0.583 | 0.001 | |
| AST, U/L | ＜0.001 | 0.744 | 0.778 | 0.026 | 0.804 | ＜0.001 | 0.132 | 0.588 | ＜0.001 | 0.696 | 0.010 | 0.827 | 0.215 | 0.712 | 0.009 | |
| GGT, U/L | 0.922 | ＜0.001 | 0.128 | 0.128 | ＜0.001 | ＜0.001 | 0.126 | 0.100 | ＜0.001 | 0.685 | 0.164 | 0.008 | 0.393 | 0.891 | 0.035 | |
| Alkaline phosphatase, U/L | 0.001 | ＜0.001 | 0.058 | ＜0.001 | ＜0.001 | ＜0.001 | 0.421 | 0.001 | ＜0.001 | 0.697 | 0.721 | 0.357 | 0.625 | 0.630 | 0.925 | |
| ALB, U/L |  |  |  |  |  |  |  |  |  |  |  |  |  |  |  | |  |  |
| GLB, U/L | 0.053 | ＜0.001 | 0.413 | 0.008 | ＜0.001 | 0.001 | 0.855 | 0.155 | 0.001 | 0.678 | 0.910 | 0.501 | 0.723 | 0.629 | 0.764 | |
| Total bilirubin, umol/L | 0.056 | 0.044 | 0.291 | 0.116 | 0.026 | ＜0.001 | 0.081 | ＜0.001 | ＜0.001 | 0.630 | 0.755 | 0.448 | 0.726 | 0.687 | 0.928 | |
| Direct bilirubin, umol/L | ＜0.001 | 0.657 | 0.665 | 0.768 | 0.442 | ＜0.001 | 0.079 | ＜0.001 | ＜0.001 | 0.752 | 0.999 | 0.311 | 0.766 | 0.832 | 0.776 | |
| PLT, 10^9/L | 0.305 | 0.065 | 0.870 | 0.258 | ＜0.001 | 0.268 | 0.596 | 0.683 | ＜0.001 | 0.453 | 0.888 | ＜0.001 | 0.508 | 0.172 | 0.066 | |
| INR |  |  |  |  |  |  |  |  |  |  |  |  |  |  |  | |  |  |
| LSM with SWE, kPa | 0.032 | ＜0.001 | 0.151 | ＜0.001 | ＜0.001 | ＜0.001 | 0.451 | 0.001 | ＜0.001 | 0.470 | 0.531 | ＜0.001 | 0.638 | 0.277 | 0.103 | |
| AFP, ng/mL | 0.020 | 0.988 | 0.996 | 0.995 | 0.987 | ＜0.001 | 0.433 | 0.045 | ＜0.001 | 0.999 | 0.996 | 0.996 | 0.998 | 0.999 | 0.995 | |
| Cirrhosis, n (%) | 0.011 | ＜0.001 | 0.768 | 0.001 | ＜0.001 | ＜0.001 | 0.361 | 0.124 | ＜0.001 | 0.036 | 0.109 | 0.059 | 0.180 | 0.016 | 0.028 | |
| REACH-B score | 0.183 | ＜0.001 | 0.674 | 0.004 | ＜0.001 | ＜0.001 | 0.990 | 0.031 | ＜0.001 | 0.360 | 0.888 | 0.104 | 0.414 | 0.284 | 0.565 | |
| Page-B score | 0.035 | ＜0.001 | 0.915 | ＜0.001 | ＜0.001 | 0.018 | 0.392 | 0.009 | ＜0.001 | 0.186 | 0.106 | ＜0.001 | 0.073 | 0.019 | 0.222 | |
| mPage-B score | 0.001 | ＜0.001 | 0.858 | ＜0.001 | ＜0.001 | 0.109 | 0.317 | 0.006 | ＜0.001 | 0.186 | 0.028 | ＜0.001 | 0.046 | 0.012 | 0.266 | |
| aMAP score | 0.004 | ＜0.001 | 0.890 | ＜0.001 | ＜0.001 | 0.010 | 0.369 | 0.007 | ＜0.001 | 0.158 | 0.108 | ＜0.001 | 0.061 | 0.011 | 0.127 | |

Data are median (first quartile, third quartile), n (%), or mean ± SD (standard deviation).

# 1- ETV group and HCC occurred during follow-up; 2- ETV group and AFP > 20 (ng/mL) during follow-up; 3- ETV group and AFP ≤ 20 (ng/mL) during follow-up; 4- TDF group and HCC occurred during follow-up; 5- TDF group and AFP > 20 (ng/mL) during follow-up; 6- TDF group and AFP ≤ 20 (ng/mL) during follow-up.

Abbreviations: ETV: entecavir. TDF: tenofovir disoproxil fumarate. AFP: alpha fetoprotein. HCC: hepatic cell carcinoma. BMI: body mass index. HBV: hepatitis B virus. NAFLD: non-alcoholic fatty liver disease. T2DM: type 2 diabetes mellitus. ALT: alanine aminotransferase. AST: aspartate aminotransferase. GGT: gamma-glutamyl transferase. ALB: albumin. GLB: globulin. TB: total bilirubin. DB: direct bilirubin. PLT: platelet. INR: international normalized ratio. SWE: shear wave elastography.

**Table 4. Predictors associated with elevated of AFP after treatment by Cox regression model in patients with HBV infection.**

| **Factors** | **Group** | **Univariate analysis** | | | **Multivariable analysis** | | |
| --- | --- | --- | --- | --- | --- | --- | --- |
| **Hazard ratio** | **95% CI** | **P value** | **Hazard ratio** | **95% CI** | **P value** |
| Age, years | ≥60 VS < 60 | 1.66 | 0.92-3.01 | 0.09 |  |  |  |
| Sex | Male VS Female | 1.16 | 0.70-1.91 | 0.57 |  |  |  |
| SWE, kPa |  | 1.08 | 1.06-1.10 | ＜0.001 | 1.05 | 1.03-1.08 | ＜0.001 |
| AFP in Baseline |  | 1.17 | 1.09-1.25 | ＜0.001 | 1.00 | 1.00-1.00 | ＜0.001 |
| PLT, 10^9/L | <100 VS ≥100 | 1.06 | 0.65-1.72 | 0.83 |  |  |  |
| Log10 HBVDNA |  | 1.19 | 1.07-1.31 | 0.001 | 1.09 | 0.91-1.29 | 0.36 |
| HBeAg(+) | Positive VS Negative | 0.99 | 0.64-1.51 | 0.95 |  |  |  |
| Log10 HBsAg, IU/mL |  | 0.87 | 0.71-1.08 | 0.21 |  |  |  |
| REACH-B score |  | 1.21 | 1.14-1.30 | ＜0.001 | 1.08 | 0.95-1.23 | 0.26 |
| Page-B score |  | 1.10 | 1.05-1.14 | ＜0.001 | 0.99 | 0.89-1.11 | 0.94 |
| mPage-B score |  | 1.13 | 1.07-1.19 | ＜0.001 | 0.87 | 0.72-1.07 | 0.19 |
| aMAP score |  | 1.06 | 1.04-1.09 | ＜0.001 | 1.08 | 0.98-1.17 | 0.12 |
| NAFLD | Yes VS No | 0.72 | 0.37-1.39 | 0.33 |  |  |  |
| T2DM | Yes VS No | 2.04 | 0.89-4.68 | 0.09 |  |  |  |
| Nucleoside analogues | ETV VS TDF | 1.65 | 0.93-2.90 | 0.08 |  |  |  |

Abbreviations: AFP: alpha fetoprotein. HCC: hepatic cell carcinoma. HBV: hepatitis B virus. PLT: platelet. INR: international normalized ratio. SWE: shear wave elastography. NAFLD: non-alcoholic fatty liver disease. T2DM: type 2 diabetes mellitus. ETV: entecavir. TDF: tenofovir disoproxil fumarate. Others: LAM: lamivudine; LdT: telbivudine; ADV: adefovir dipivoxil.

**Table 5. Predictors associated with occurrence of HCC after treatment in patients with HBV infection.**

| **Factors** | **Group** | **Univariate analysis** | | | **Multivariable analysis** | | |
| --- | --- | --- | --- | --- | --- | --- | --- |
| **Hazard ratio** | **95% CI** | **P value** | **Hazard ratio** | **95% CI** | **P value** |
| Age, years | ≥60 VS < 60 | 4.41 | 1.88-10.32 | 0.001 | 1.13 | 0.29-4.43 | 0.87 |
| Sex | Male VS Female | 1.30 | 0.49-3.50 | 0.60 |  |  |  |
| SWE, kPa |  | 1.09 | 1.06-1.12 | ＜0.001 | 1.07 | 1.02-1.12 | 0.01 |
| AFP in Baseline |  | 1.02 | 0.98-1.04 | 0.45 |  |  |  |
| PLT, 10^9/L | <100 VS ≥100 | 2.15 | 0.95-4.84 | 0.07 |  |  |  |
| Log10 HBVDNA |  | 1.10 | 0.92-1.32 | 0.30 |  |  |  |
| HBeAg(+) | Positive VS Negative | 0.96 | 0.43-2.14 | 0.92 |  |  |  |
| Log10 HBsAg, IU/mL |  | 0.69 | 0.55-1.03 | 0.11 |  |  |  |
| REACH-B score |  | 1.32 | 1.17-1.50 | ＜0.001 | 1.12 | 0.95-1.32 | 0.18 |
| Page-B score |  | 1.18 | 1.08-1.29 | ＜0.001 | 0.95 | 0.77-1.18 | 0.64 |
| mPage-B score |  | 1.29 | 1.16-1.43 | ＜0.001 | 1.19 | 0.78-1.79 | 0.42 |
| aMAP score |  | 1.12 | 1.06-1.17 | ＜0.001 | 1.01 | 0.86-1.18 | 0.94 |
| NAFLD | Yes VS No | 0.48 | 0.11-2.06 | 0.33 |  |  |  |
| T2DM | Yes VS No | 4.21 | 1.25-14.17 | 0.02 | 0.63 | 0.11-3.69 | 0.61 |
| Nucleoside analogues | ETV VS TDF | 6.90 | 0.92-51.68 | 0.06 |  |  |  |

Abbreviations: AFP: alpha fetoprotein. HCC: hepatic cell carcinoma. HBV: hepatitis B virus. PLT: platelet. INR: international normalized ratio. SWE: shear wave elastography. NAFLD: non-alcoholic fatty liver disease. T2DM: type 2 diabetes mellitus. ETV: entecavir. TDF: tenofovir disoproxil fumarate. Others: LAM: lamivudine; LdT: telbivudine; ADV: adefovir dipivoxil.
